# Supplementary material
Source: PubMed Central journal article supplement (PMC196902)

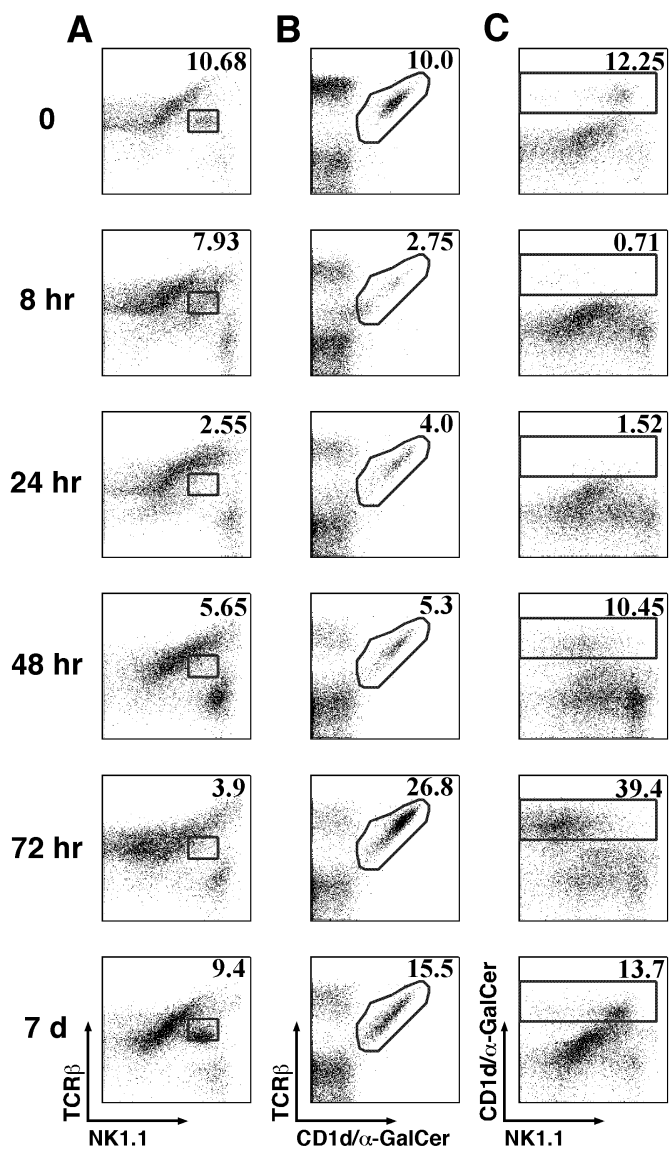

Supplement: pnas_100_19_10913__2.pdf [file pnas_100_19_10913__2.pdf]

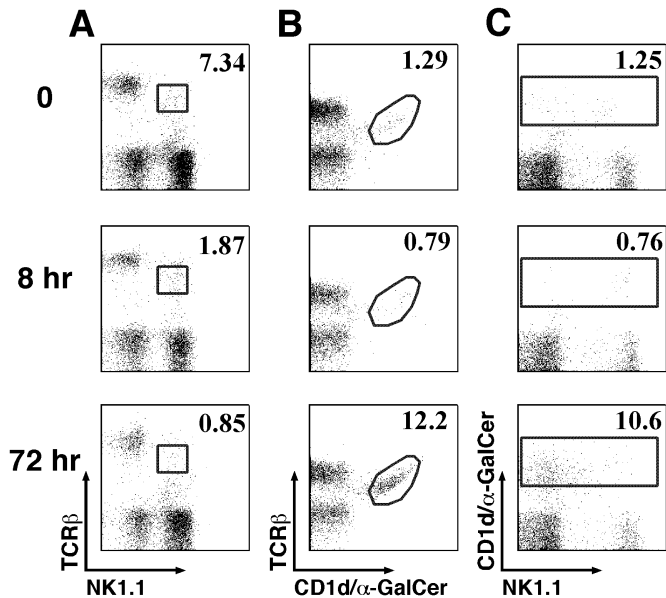

Supplement: pnas_100_19_10913__4.pdf [file pnas_100_19_10913__4.pdf]

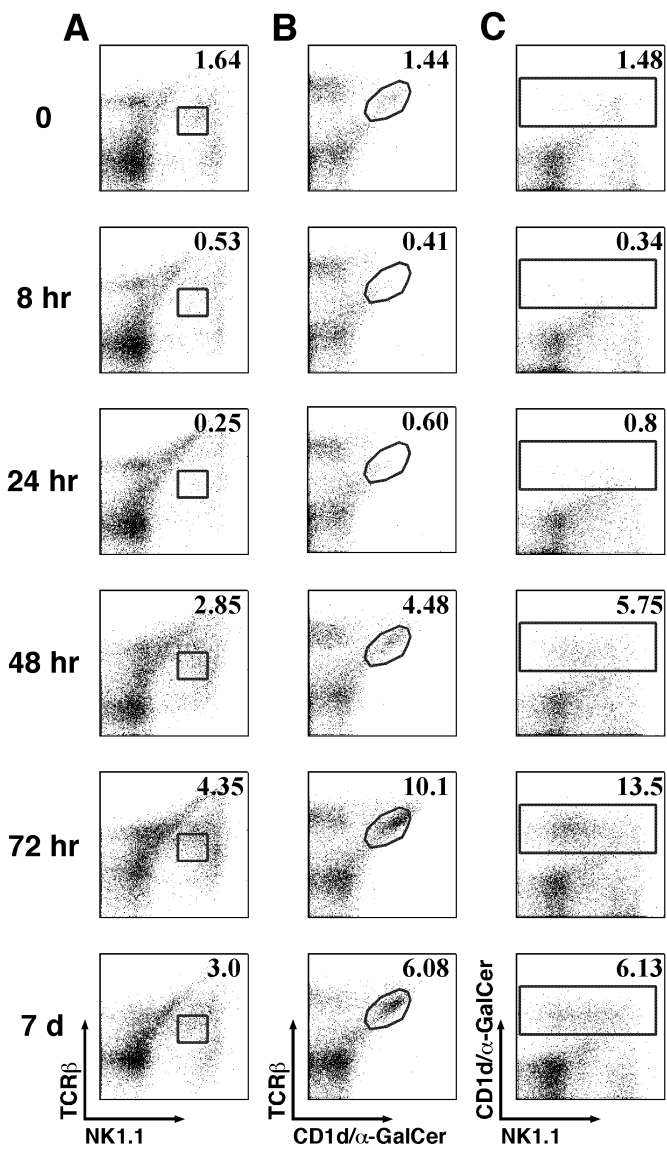

Supplement: pnas_100_19_10913__6.pdf [file pnas_100_19_10913__6.pdf]
